# Supplementary material
Source: PubMed Central journal article supplement (PMC9467599)
Supplement: KCCY_A_2085356_SM7161.pdf [file KCCY_A_2085356_SM7161.pdf]

**Table S1. Sequence of primers in this study**

| Gene       | Forward (5' to 3')                  | Reverse (5' to 3')              |
|------------|-------------------------------------|---------------------------------|
| SAMHD1     | ACTGCCATCATCTTGGAA<br>TCCAA         | GGGCAAACCTTAATAAAGC<br>GCTTGT   |
| MAP2K6     | GAAGCATTGGAACAACC<br>TCAGAC         | CCTGGCTATTTACTGTGGC<br>TC       |
| KLF4       | CCAGAGGAGCCCAAGCC<br>AAAG           | ATCCACAGCCGTCCCAGT<br>C         |
| GAPDH      | GGGAAGGTGAAGGTCGG<br>AGT            | GGGGTCATTGATGGCAAC<br>A         |
| SAMHD1-151 | CGGGGTACCCCGAAGGG<br>CTCAACTGTC     | CCCAAGCTTGGCTACACC<br>TGGCGTCCG |
| SAMHD1-233 | CGGGGTACCTGGCGGGA<br>TTGATTTGAG     | CCCAAGCTTGGCTACACC<br>TGGCGTCCG |
| SAMHD1-285 | CGGGGTACCTGCCCTCA<br>GTTCTGCTTC     | CCCAAGCTTGGCTACACC<br>TGGCGTCCG |
| SAMHD1-399 | CGGGGTACCAGGTGCGG<br>CGGGTAGTGTA    | CCCAAGCTTGGCTACACC<br>TGGCGTCCG |
| SAMHD1-553 | CGGGGTACCACTGTGGA<br>ATGAAGACACCCTC | CCCAAGCTTGGCTACACC<br>TGGCGTCCG |
| SAMHD1-667 | CGGGGTACCTGGGAATG<br>CAGTTGGGATG    | CCCAAGCTTGGCTACACC<br>TGGCGTCCG |

|             |                                 |                                 |
|-------------|---------------------------------|---------------------------------|
| SAMHD1-937  | CGGGGTACCTAAGCTATT<br>CCGCCTCAT | CCCAAGCTTGGCTACACC<br>TGGCGTCCG |
| SAMHD1-1950 | CGGGGTACCTGGAGTGC<br>AACGGGAAGA | CCCAAGCTTGTTCTCGGG<br>CTGTCATCG |
| SAMHD1-285  | CTGCTTCTAGCCACGAA               | ACGTGAACGCGAAATTC               |
| mutant      | ATTTCGCGTTCACGT                 | GTGGCTAGAAGCAG                  |
| SAMHD1-ChIP | GCTCTTTCCTCCCCCTTT<br>CC        | GCAGTCCAGTCGTCCTCA<br>AA        |

---

**Table S2. The information of primary antibodies in this study**

| <b>Antibodies</b> | <b>Company</b> | <b>Cat.No</b> | <b>Concentration</b>         |
|-------------------|----------------|---------------|------------------------------|
| Anti-SAMHD1       | Proteintech    | 12586-1-AP    | WB: 1:2000<br>IHC: 1:200     |
| Anti-HA-tag       | ABclonal       | AE008         | WB: 1:2000                   |
| Anti-MAP2K6       | Proteintech    | 12745-1-AP    | WB: 1:500                    |
| Anti-Phos-p38     | Affinity       | AF4001        | WB: 1:500                    |
| Anti-p38          | Affinity       | AF6456        | WB: 1:500                    |
| Anti-GAPDH        | Affinity       | AF7021        | WB: 1:3000                   |
| Anti-KLF4         | Proteintech    | 11880-1-AP    | WB: 1:500<br>ChIP: 2 $\mu$ g |

**Fig.S1**

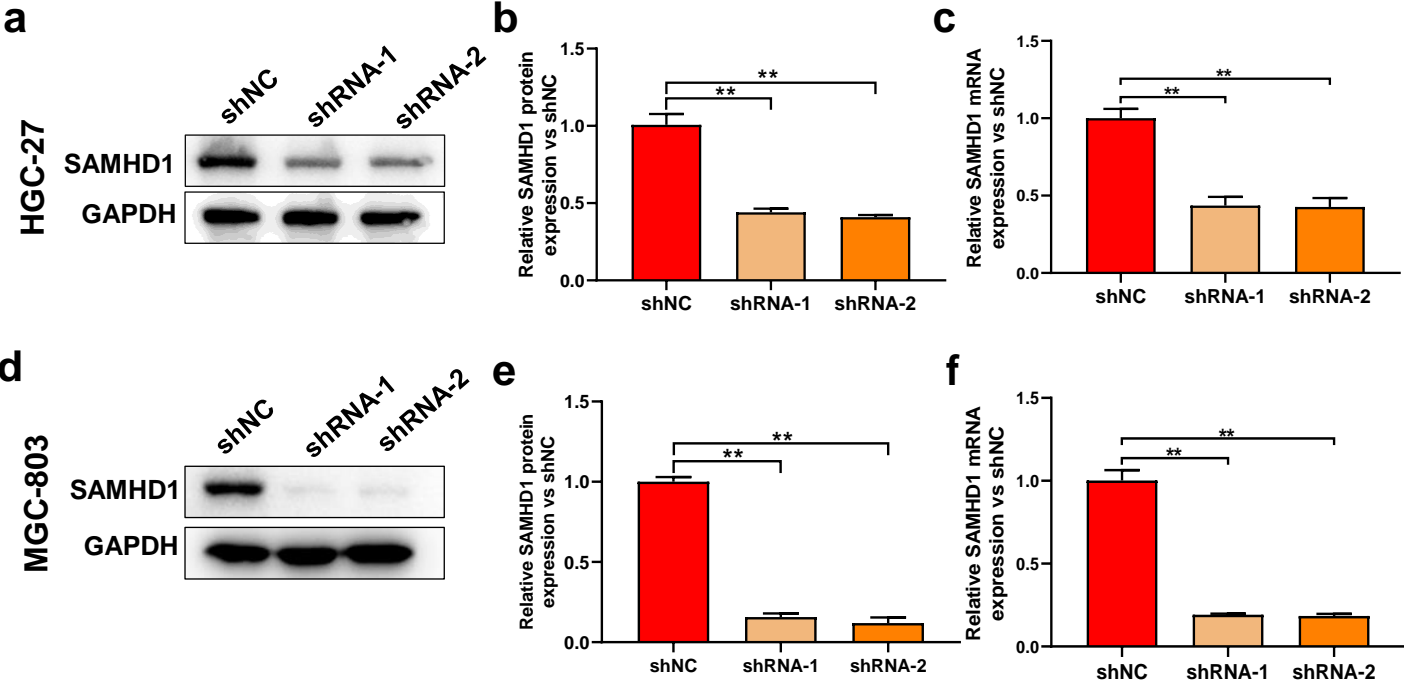

**Fig.S1 Establishment of HGC-27 and MGC-803 cells with stable knockdown of SAMHD1.** (a, b) Western blot was used to detect the expression levels of SAMHD1 protein in HGC-27 cells. (c) The expression levels of SAMHD1 mRNA in HGC-27 cells were detected using qRT-PCR. (d, e) Western blot was used to detect the expression levels of SAMHD1 protein in MGC-803 cells. (f) The expression levels of SAMHD1 mRNA in MGC-803 cells were detected using qRT-PCR.

**Fig.S2**

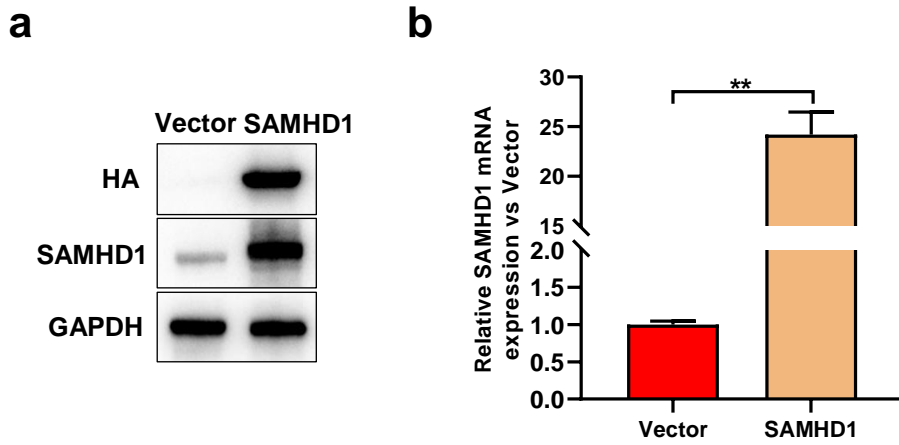

**Fig.S2 Establishment of AGS cells with stable overexpression of SAMHD1.** (a) Western blot was used to detect the expression levels of SAMHD1 protein in AGS cells. (b) The expression levels of SAMHD1 mRNA in AGS cells were detected using qRT-PCR.

**Fig.S3**

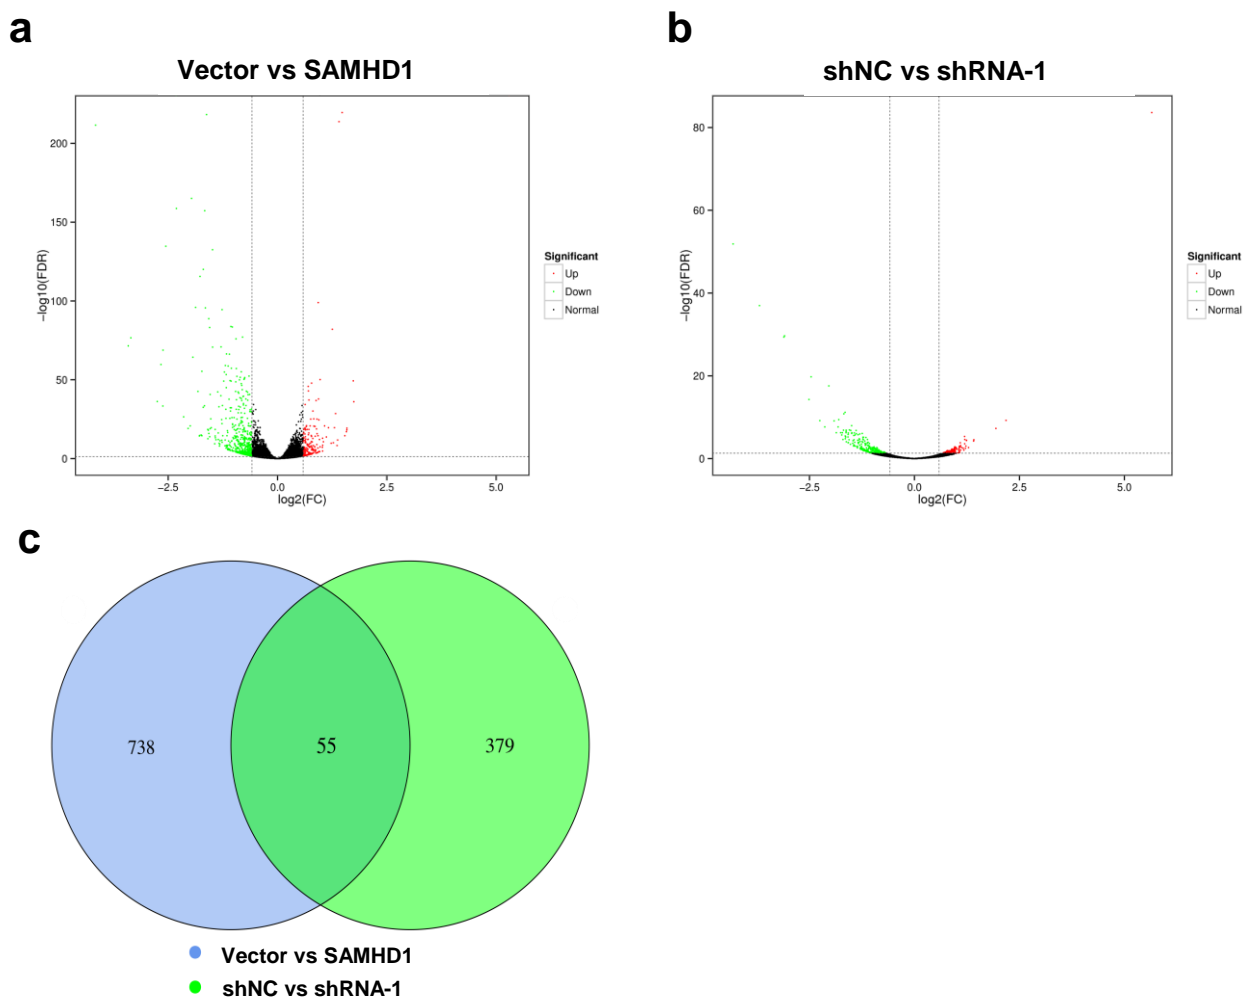

**Fig.S3 Analysis of differentially expressed genes in AGS and HGC-27 cells. (a)** The RNA seq was performed in AGS cells from SAMHD1 and Vector groups, and the Volcano plot is presented. **(b)** The RNA seq was performed in HGC-27 cells from shRNA-1 and shNC groups, and the Volcano plot is presented. **(c)** Venn diagram of differentially expressed genes in AGS and HGC-27 cells. Each set of mapping data was obtained from two independent RNA-seq.

**Fig.S4**

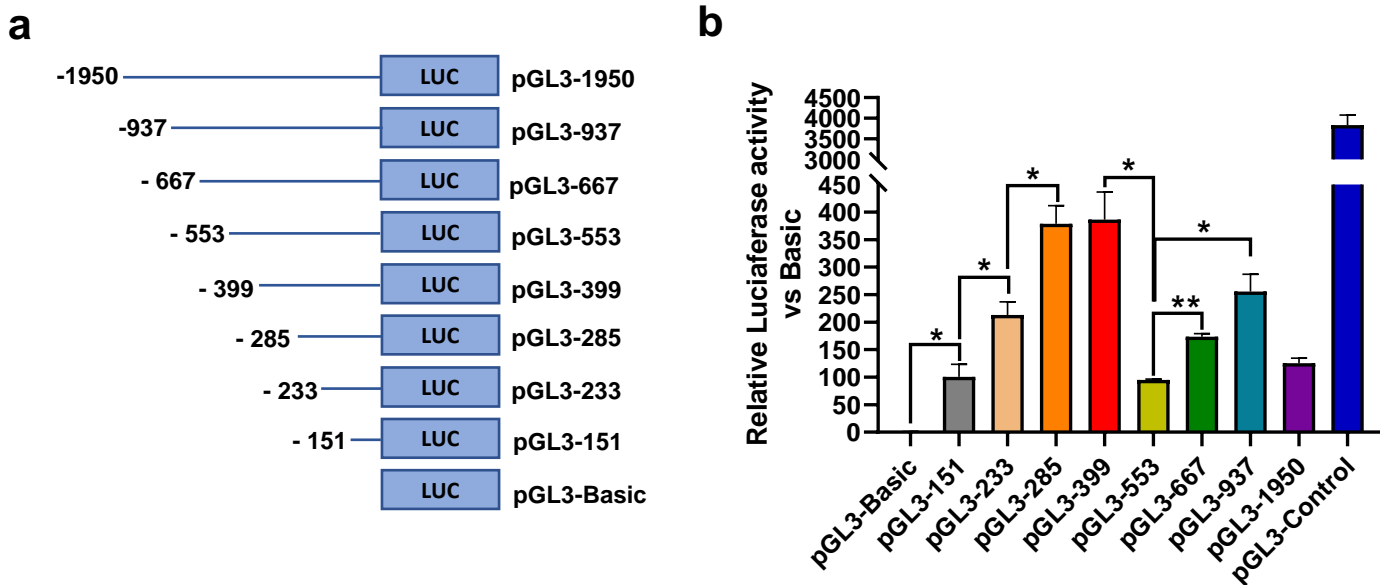

**Fig.S4 Identification of core promoter of SAMHD1 gene.** (a) Schematic diagram of pGL3 plasmids containing SAMHD1 promoter. (b) Double luciferase reporting assay was used to identify the core promoter of SAMHD1 gene.
